# Supplementary material for: An Accurate 10 m Annual Crop Map Product of Maize and Soybean Across the United States
Source: Copernicus journal article supplement (doi:10.5194/essd-2025-361), 2025-07-14
Supplement: Supplementary file 1 [file essd-2025-361-supplement.pdf]

**Table S1 Nadir BRDF-adjusted reflectance (NBAR) bands, indices, and multi-temporal metrics derived from the 10-day Sentinel-2 analysis-ready data. Metric names are shown in brackets. Two sets of metrics of basic statistics, average values, standard deviation, and amplitude were calculated from 1) 10-day time-series observations ranked by individual NBAR band or index and 2) 10-day time-series observations ranked by NDVI values.**

| NBAR bands and indices     | Blue, Green, Red, Red-Edge1, Red-Edge2, Red-Edge3, NNIR,<br>NIR, SWIR1, SWIR2, NDVI, SWSW |
|----------------------------|-------------------------------------------------------------------------------------------|
| Basic statistics           | second maximum (smax)                                                                     |
|                            | second minimum (smin)                                                                     |
|                            | median (p50)                                                                              |
|                            | 10th, 25th, 75th, 90th percentiles (p10, p25, p75, p90)                                   |
|                            | p90 and smax (av90smax)                                                                   |
| Average between            | p75 and smax (av75smax)                                                                   |
|                            | p50 and smax (av50smax)                                                                   |
|                            | p25 and p75 (av2575)                                                                      |
|                            | smin and p90 (avsmin90)                                                                   |
|                            | smin and p25 (avsmin25)                                                                   |
| Standard Deviation between | smin and p10 (avsmin10)                                                                   |
|                            | p90 and smax (std90smax)                                                                  |
|                            | p75 and smax (std75smax)                                                                  |
|                            | p50 and smax (std50smax)                                                                  |
|                            | p25 and p75 (std2575)                                                                     |
|                            | smin and p90 (stdsmin90)                                                                  |
|                            | smin and p25 (stdsmin25)                                                                  |
|                            | smin and p10 (stdsmin10)                                                                  |
| Amplitude between          | smax and smin (ampsmamaxamin)                                                             |
|                            | p75 and p25 (amp7525)                                                                     |
|                            | smax and p50 (ampsmamax50)                                                                |
|                            | p50 and smin (amp50smin)                                                                  |
|                            | smax and p75 (ampsmamax75)                                                                |
|                            | p25 and smin (amp25smin)                                                                  |

**Table S2 Maize and soybean stratification for field survey, from 2019 to 2022. PSU: primary sampling unit; SSU: secondary sampling unit; H: high stratum; M: medium stratum; L: low stratum; T: total.**

| Year | Stratum | Maize/soy<br>pixel coverage | Number of<br>blocks | Number of<br>PSUs | Number of<br>SSUs | PSU<br>size   | SSU<br>size |
|------|---------|-----------------------------|---------------------|-------------------|-------------------|---------------|-------------|
| 2019 | High    | 50%                         | 1,301               | 30                | 20 * 30           | 20 km × 20 km | 30 m × 30 m |
|      | Medium  | 40%                         | 2,378               | 30                | 20 * 30           |               |             |
|      | Low     | 9.9%                        | 3,680               | 30                | 20 * 30           |               |             |
|      | Total   | 99.9%                       | 7,359               | 90                | 1,800             |               |             |
| 2020 | High    | 50%                         | 1,321               | 30                | 20 * 30           | 20 km × 20 km | 30 m × 30 m |
|      | Medium  | 40%                         | 2,388               | 30                | 20 * 30           |               |             |
|      | Low     | 9.9%                        | 3,709               | 30                | 20 * 30           |               |             |
|      | Total   | 99.9%                       | 7,418               | 90                | 1,800             |               |             |
| 2021 | High    | 50%                         | 1,395               | 35                | 20 * 35           | 20 km × 20 km | 30 m × 30 m |
|      | Medium  | 40%                         | 2,592               | 40                | 20 * 40           |               |             |
|      | Low     | 9.9%                        | 3,715               | 25                | 20 * 25           |               |             |
|      | Total   | 99.9%                       | 7,702               | 100               | 2,000             |               |             |
| 2022 | High    | 50%                         | 1,407               | 35                | 20 * 35           | 20 km × 20 km | 10 m × 10 m |
|      | Medium  | 40%                         | 2,592               | 37                | 20 * 37           |               |             |
|      | Low     | 9.9%                        | 3,722               | 25                | 20 * 25           |               |             |
|      | Total   | 99.9%                       | 7,721               | 92                | 1,840             |               |             |

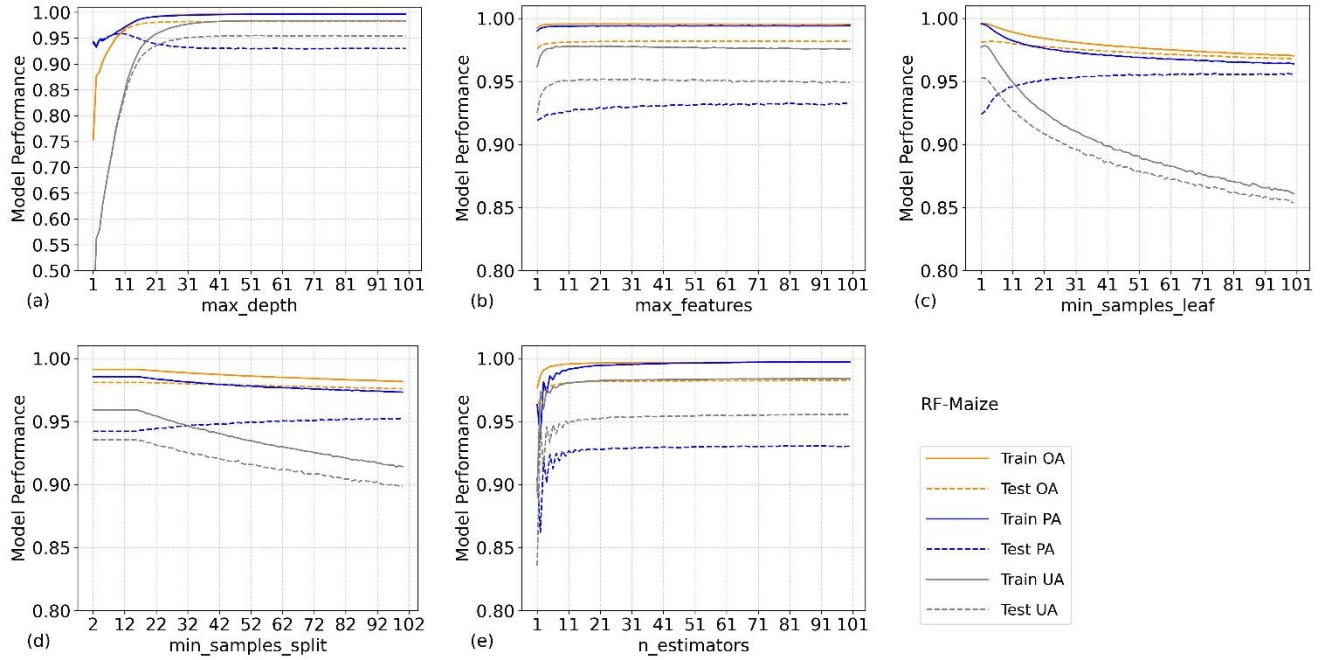

**Figure S1 Hyper-parameters fine-tuning for RF-Maize.** (a) **max\_depth**: the maximum depth of a tree; (b) **max\_features**: the number of features to consider when looking for the best split; (c) **min\_samples\_leaf**: the minimum number of samples required to be at a leaf node; (d) **min\_samples\_split**: the minimum number of samples required to split an internal node; (e) **n\_estimators**: the number of trees in a forest. OA: Overall Accuracy; PA: Producers' Accuracy; UA: Users' Accuracy.

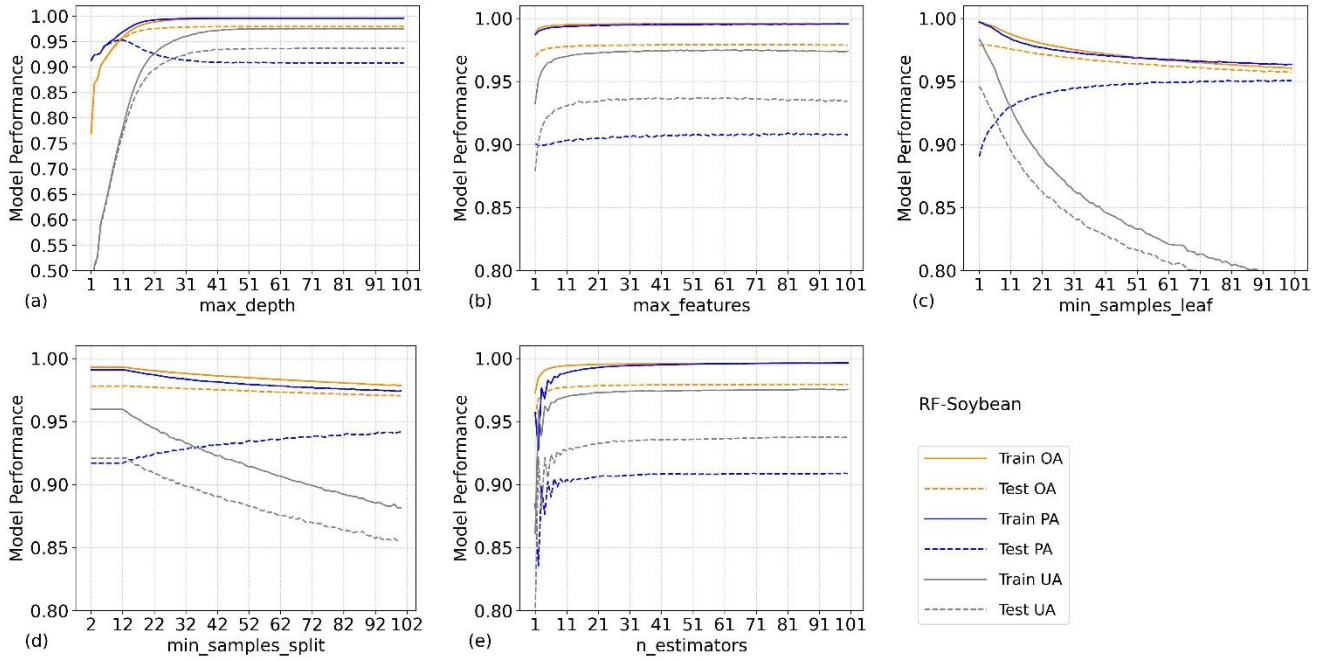

**Figure S2: Hyper-parameters fine-tuning for RF-Soybean.** (a) **max\_depth**: the maximum depth of a tree; (b) **max\_features**: the number of features to consider when looking for the best split; (c) **min\_samples\_leaf**: the minimum number of samples required to be at a leaf node; (d) **min\_samples\_split**: the minimum number of samples required to split an internal node; (e) **n\_estimators**: the number of trees in a forest. OA: Overall Accuracy; PA: Producers' Accuracy; UA: Users' Accuracy.

**Table S3 Fine-tuned hyper-parameters for RF-Maize and RF-Soybean models.**

| Hyper-parameter   | RF-Maize | RF-Soybean |
|-------------------|----------|------------|
| Max_depth         | 30       | 50         |
| Max_features      | 28       | 34         |
| Min_samples_leaf  | 8        | 6          |
| Min_samples_split | 10       | 10         |
| N_estimators      | 50       | 50         |

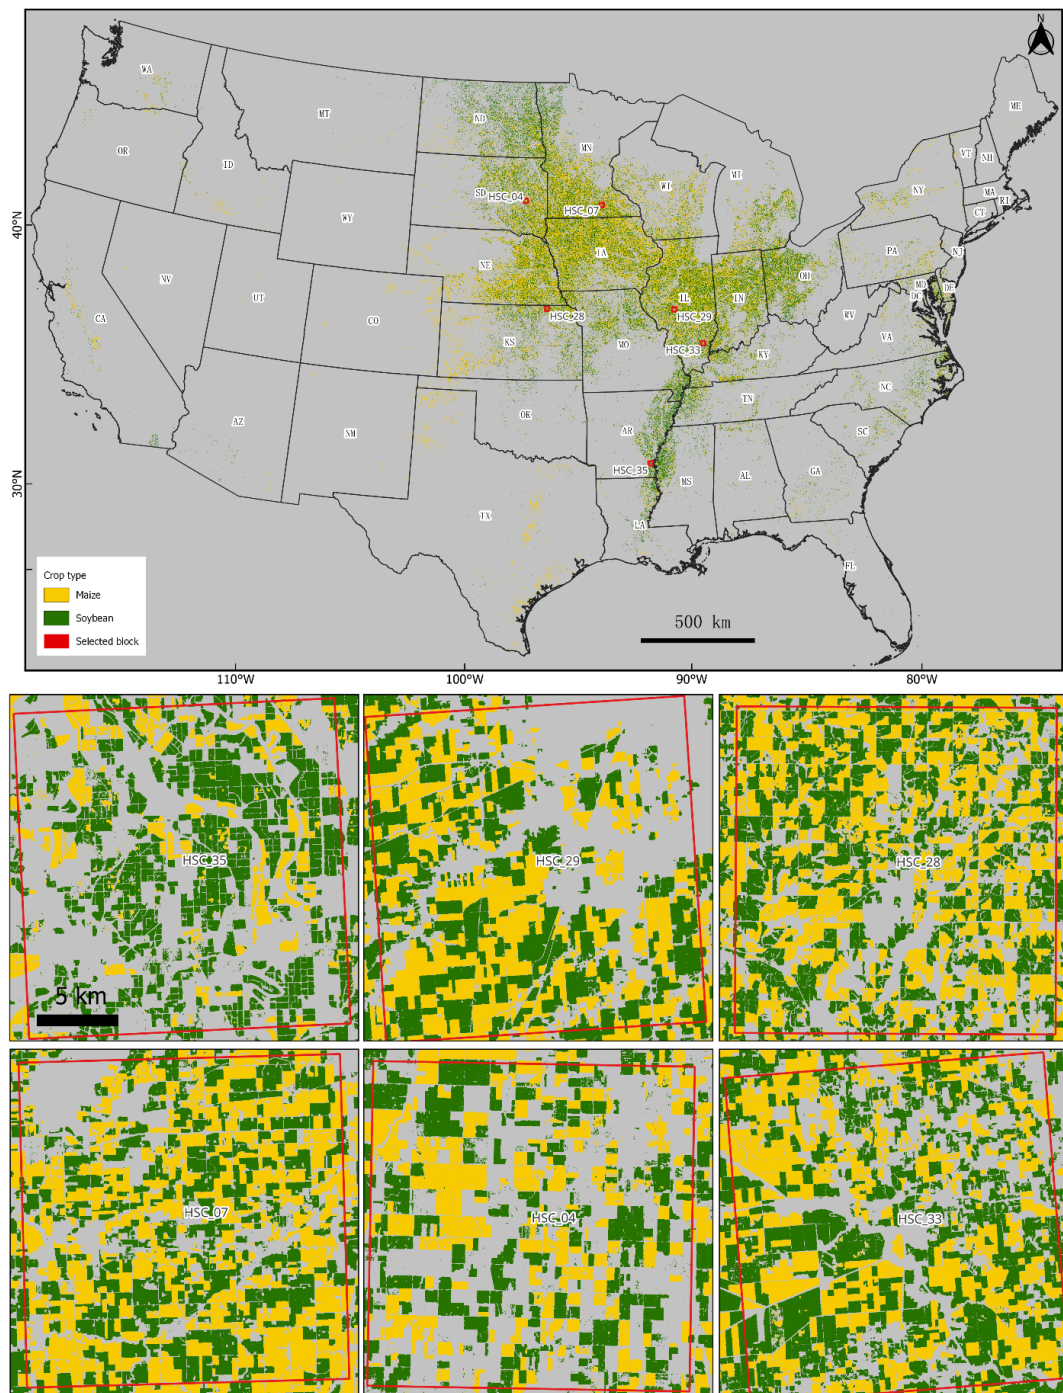

**Figure S3:** The selected 20 km  $\times$  20 km primary sampling units (PSU) blocks used to derive NDVI and multi-temporal metrics for maize and soybean pixels. The maize and soybean map for 2022 is shown. The PSU blocks HSC\_35, HSC\_29, HSC\_28, HSC\_07, and HSC\_04 are used to derive single-year data for 2022. The PSU block HSC\_33 is used to derive four-year data from 2019 to 2022.

**Table S4 The selected 20 km × 20 km primary sampling units (PSU) blocks used to derive NDVI for maize and soybean pixels. The PSU blocks HSC\_35, HSC\_29, HSC\_28, HSC\_07, and HSC\_04 are used to derive single-year data for 2022. The PSU block HSC\_33 is used to derive four-year data from 2019 to 2022.**

| PSU ID | Stratum | Location     | Center coordinates     | Maize pixels | Soybean pixels |
|--------|---------|--------------|------------------------|--------------|----------------|
| HSC_35 | High    | Arkansas     | (91.374° W, 33.570° N) | 390,039      | 1,229,816      |
| HSC_29 | High    | Illinois     | (89.725° W, 39.690° N) | 12,73,135    | 1,218,699      |
| HSC_28 | High    | Kansas       | (96.449° W, 39.870° N) | 1,395,915    | 1,397,590      |
| HSC_07 | High    | Minnesota    | (93.406° W, 44.010° N) | 1,704,091    | 1,409,508      |
| HSC_04 | High    | South Dakota | (97.679° W, 44.190° N) | 1,045,399    | 1,134,050      |
| HSC_33 | High    | Illinois     | (88.350° W, 38.250° N) | 390,039      | 1,229,816      |
